# Supplementary material for: An Odorant Receptor from the Proboscis of the Cotton Bollworm Helicoverpa armigera (Lepidoptera: Noctuidae) Narrowly Tuned to Indole
Source: MDPI journal article supplement (doi:10.3390/insects13040385), 2022-04-13
Supplement: s1 [file s1]

**Table S1. Synthetic compounds for functional identification of HarmORs**

| Compound                | CAS        | Provider      |
|-------------------------|------------|---------------|
| Ethylamine              | 75-04-7    | Sigma-Aldrich |
| Butylamine              | 109-73-9   | Sigma-Aldrich |
| Heptylamine             | 111-68-2   | Sigma-Aldrich |
| Spermidine              | 124-20-9   | Sigma-Aldrich |
| Pentylamine             | 110-58-7   | Sigma-Aldrich |
| 1,4-Diethylbenzene      | 105-05-5   | Sigma-Aldrich |
| N-methylpiperidine      | 626-67-5   | Sigma-Aldrich |
| Propionaldehyde         | 123-38-6   | Sigma-Aldrich |
| Butyraldehyde           | 123-72-8   | Sigma-Aldrich |
| Acetic acid             | 64-19-7    | Sigma-Aldrich |
| Propionic acid          | 79-09-4    | Sigma-Aldrich |
| DL-lactic acid          | 50-21-5    | Sigma-Aldrich |
| 2,6-Di-tert-butylphenol | 128-39-2   | Sigma-Aldrich |
| 2-Phenylethanol         | 60-12-8    | Sigma-Aldrich |
| (Z)-3-hexen-1-ol        | 928-96-1   | Sigma-Aldrich |
| $\beta$ -Citronellol    | 106-22-9   | Sigma-Aldrich |
| Geraniol                | 106-24-1   | Sigma-Aldrich |
| (Z)-2-hexen-1-ol        | 928-94-9   | Sigma-Aldrich |
| 1-Heptanol              | 111-70-6   | Sigma-Aldrich |
| 1-Hexanol               | 111-27-3   | Sigma-Aldrich |
| (E)-3-Hexen-1ol         | 928-97-2   | Sigma-Aldrich |
| 3,7-Dimethyl-3-octanol  | 78-69-3    | Sigma-Aldrich |
| (1R)-(-)-Myrtenol       | 19894-97-4 | Sigma-Aldrich |
| (-)-trans-Pinocarveol   | 547-61-5   | Sigma-Aldrich |
| (-)-Linalool            | 126-91-0   | Sigma-Aldrich |
| Linalool                | 78-70-6    | Sigma-Aldrich |
| Benzyl alcohol          | 100-51-6   | Sigma-Aldrich |
| 1-Octen-3-ol            | 3391-86-4  | Sigma-Aldrich |
| (E)-2-Hexen-1-al        | 6728-26-3  | Sigma-Aldrich |
| (1R)-(-)-Myrtenal       | 18486-69-6 | Sigma-Aldrich |
| Heptanal                | 111-71-7   | Sigma-Aldrich |
| Phenylacetaldehyde      | 122-78-1   | Sigma-Aldrich |
| 2-Heptanone             | 110-43-0   | Sigma-Aldrich |
| 2,3-Butanedione         | 431-03-8   | Sigma-Aldrich |
| (R)-(+)-Limonene        | 5989-27-5  | Sigma-Aldrich |
| $\alpha$ -Pinene        | 80-56-8    | Sigma-Aldrich |
| $\alpha$ -Humulene      | 6753-98-6  | Sigma-Aldrich |
| (-)-trans-Caryophyllene | 87-44-5    | Sigma-Aldrich |
| Cumene                  | 98-82-8    | Sigma-Aldrich |
| Sabinene                | 3387-41-5  | Sigma-Aldrich |
| Methyl Salicylate       | 119-36-8   | Sigma-Aldrich |
| Ethyl acetate           | 141-78-6   | Sigma-Aldrich |
| Methyl jasmonate        | 39924-52-2 | Sigma-Aldrich |
| Butyl salicylate        | 2052-14-4  | Sigma-Aldrich |
| Nonanal                 | 124-19-6   | Sigma-Aldrich |
| Methyl eugenol          | 93-15-2    | Sigma-Aldrich |
| (1S)-(-)-Verbenone      | 1196-01-6  | Sigma-Aldrich |
| (S)-cis-Verbenol        | 18881-04-4 | Sigma-Aldrich |
| Methyl benzoate         | 93-58-3    | Sigma-Aldrich |

|                                |            |               |
|--------------------------------|------------|---------------|
| Myrcene                        | 123-35-3   | Sigma-Aldrich |
| (-)- $\beta$ -Pinene           | 18172-67-3 | Sigma-Aldrich |
| (S)-(-)-Limonene               | 5989-54-8  | Sigma-Aldrich |
| $\alpha$ -Terpinene            | 99-86-5    | Sigma-Aldrich |
| (-)-Caryophyllene oxide        | 1139-30-6  | Sigma-Aldrich |
| Farnesene, mixture of isomers  | 502-61-4   | Sigma-Aldrich |
| 4-Ethylbenzaldehyde            | 4748-78-1  | Sigma-Aldrich |
| 3-Vinylbenzaldehyde            | 19955-99-8 | Sigma-Aldrich |
| Benzaldehyde                   | 100-52-7   | Sigma-Aldrich |
| (Z)-3-Hexenyl acetate          | 3681-71-8  | Sigma-Aldrich |
| (E)-2-Hexenyl acetate          | 2497-18-9  | Sigma-Aldrich |
| 4'-Ethylacetophenone           | 937-30-4   | Sigma-Aldrich |
| Cinnamaldehyde                 | 104-55-2   | Sigma-Aldrich |
| ( $\pm$ )-Citronellal          | 106-23-0   | Sigma-Aldrich |
| Benzyl acetate                 | 140-11-4   | Sigma-Aldrich |
| 2-Pentadecanone                | 2345-28-0  | Sigma-Aldrich |
| Cedrol                         | 77-53-2    | Sigma-Aldrich |
| Indole                         | 120-72-9   | Sigma-Aldrich |
| 3-Methylindole                 | 83-34-1    | Sigma-Aldrich |
| Indole-3-carboxaldehyde        | 487-89-8   | Sigma-Aldrich |
| Benzyl acetone                 | 2550-26-7  | Sigma-Aldrich |
| Salicylaldehyde                | 90-02-8    | Sigma-Aldrich |
| 4-Methoxybenzyl alcohol        | 105-13-5   | Sigma-Aldrich |
| 4-Hydroxy-4-methyl-2-pentanone | 123-42-2   | Sigma-Aldrich |
| Methyl phenylacetate           | 101-41-7   | Sigma-Aldrich |
| Eugenol                        | 97-53-0    | Sigma-Aldrich |
| 1-Octanol                      | 111-87-5   | Sigma-Aldrich |
| Ocimene                        | 13877-91-3 | Sigma-Aldrich |
| cis-Jasmone                    | 488-10-8   | Sigma-Aldrich |
| $\delta$ -Decanolactone        | 705-86-2   | Sigma-Aldrich |
| Geranyl acetate                | 105-87-3   | Sigma-Aldrich |

---
