# Supplementary material for: An Odorant Receptor from the Proboscis of the Cotton Bollworm Helicoverpa armigera (Lepidoptera: Noctuidae) Narrowly Tuned to Indole
Source: MDPI journal article supplement (doi:10.3390/insects13040385), 2022-04-13
Supplement: s1 [file s1]

**Table S2: Full-length sequences of HarmOR24 and OR30 cloned from the proboscis**

| Gene Name | Identity with Reference Gene | Transmembrane domains | Amino Acid Sequences                                                                                                                                                                                                                                                                                                                                                                                                              |
|-----------|------------------------------|-----------------------|-----------------------------------------------------------------------------------------------------------------------------------------------------------------------------------------------------------------------------------------------------------------------------------------------------------------------------------------------------------------------------------------------------------------------------------|
| HarmOR24  | 99.5%                        | 7                     | MDSKMSLSSASLATHLRLLRWCGYCRLAGGARLSRLHALYRALTLALTTVYLLQ<br>ECVYAYQVQQDMDKLARVMFLLLCHITSIAKQLVFHLKAERIDEMLAGLEDPLY<br>NQPEEAHRRLLGATAASASRFVRAYSGCVVCTLTWITFPVMYRLQGLPVEFPF<br>WITVDYNRPTMFILVLAYSYYVTTLVGIANTTMDAFMATVLNQCKTQLRLLRMN<br>FECLPERAAALSRQLGGSYDAALFALFRECLVHYEKITETAKMLQNIFGTAILIQF<br>GIGGWILCMAAYKIVSLNMLSVEFASMAFISCILTEFLYCYYGNEVTDESERVS<br>QSLYSMEWRRARLTFRRSLVLVMERAKRPLRPAAGRVIPLSLDTFVKIIKSSYTFYA<br>VLRQTK- |
| HarmOR30  | 97.4%                        | 7                     | MFSSDLFLNRAKFVMKHLGVWIPAENGSLDRAYRAFMMTLQYLFLIFQMIYIV<br>QVWGDLDVVSQASYLLFTQACLCLKVTIFQININMLKELLQFMDADIFKPDNEV<br>HENILKLQAARIKRLLLAFMVSSQITCGLWAMKPLFDDADRKFPPDMWMPVSPE<br>KAGQYYMGYAFQLGTICISAYMYFGVDSVVFSSVIFGCAQIDIKEKIMSITTVDK<br>QGTKEALAQNYNKLVDCKHHQAIVTFTELVENAYHPYLLFQLVGSVGIICMSA<br>LRILVVDWRSMQFFSILTYVSVMISQLFVCCWCGHELTATSEDLHTVLYKCIWYE<br>QDVKFKRELCFAMMRISRPLVLRAGHYIILSRQTFVAILRMSYSYFAVLNQTT-                |
